# Supplementary material for: Environmental and socio-economic sustainability assessment of remediation alternatives for a contaminated oil refinery site in Southern China
Source: Research Square preprint supplement (doi:10.21203/rs.3.rs-6889334/v1), 2025-07-25
Supplement: Supplementary file 1 [file 0583b63a1bc159b18a7a6fa0.pdf]

## Supplementary Information

### Environmental and socio-economic sustainability assessment of remediation alternatives for a contaminated oil refinery site in Southern China

Yingluo Jia<sup>a</sup>, Xianglan Li<sup>a,\*</sup>, Hongzhen Zhang<sup>b</sup>, Chunlong Zhang<sup>c</sup>, Yafei Wang<sup>e</sup>, Meijie Zhu<sup>d</sup>, Chunhui Sang<sup>a</sup>, Yuxin Nie<sup>a</sup>, Hao Meng<sup>a,b</sup>, Peng Liu<sup>a,f</sup>, Jingqi Dong<sup>b</sup>

<sup>a</sup>Faculty of Geographical Science, Beijing Normal University, Beijing 100875, China.

<sup>b</sup>Chinese Academy of Environmental Planning, Beijing 100006, China.

<sup>c</sup>University of Houston–Clear Lake, Houston, Texas 77058, USA.

<sup>d</sup>Faculty of Business, Hong Kong Chu Hai College, Hong Kong 999077, China.

<sup>e</sup>School of Mechanical Engineering, Beijing Institute of Petrochemical Technology, Beijing 102617, China.

<sup>f</sup>Beijing Construction Engineering Environmental Remediation Co., Ltd., Beijing 100015, China.

#### \*Corresponding author:

Email: xlli@bnu.edu.cn (Xianglan Li)

## Contents

### 1. Social and economic sustainable indicators

**Table S1** Social and economic indicators for MCA

| Category | Label  | Sub-category                            | Category | Priority Weighting | Unit |
|----------|--------|-----------------------------------------|----------|--------------------|------|
| Economic | ECON 1 | Total economic cost                     | Quan     | 1                  | ¥    |
|          | ECON 2 | Net present value                       | Quan     | 0.5                | ¥    |
|          | ECON 3 | Employment opportunity                  | Qual     | 0.5                | n/a  |
|          | ECON 4 | Net present value ratio                 | Quan     | 0.5                | n/a  |
|          | ECON 5 | Operation time                          | Quan     | 1                  | days |
| Social   | SOC 1  | Installation and operational risks      | Quan     | 1                  | hrs  |
|          | SOC 2  | Ethics and equality                     | Qual     | 0.5                | n/a  |
|          | SOC 3  | Dust, traffic, noise, vibration         | Qual     | 1                  | n/a  |
|          | SOC 4  | Communities and community involvement   | Qual     | 0.5                | n/a  |
|          | SOC 5  | Robustness of sustainability assessment | Qual     | 0.5                | n/a  |

Qual= qualitative; Quan= quantitative

### 2. Overall sustainability appraisal based on BNs

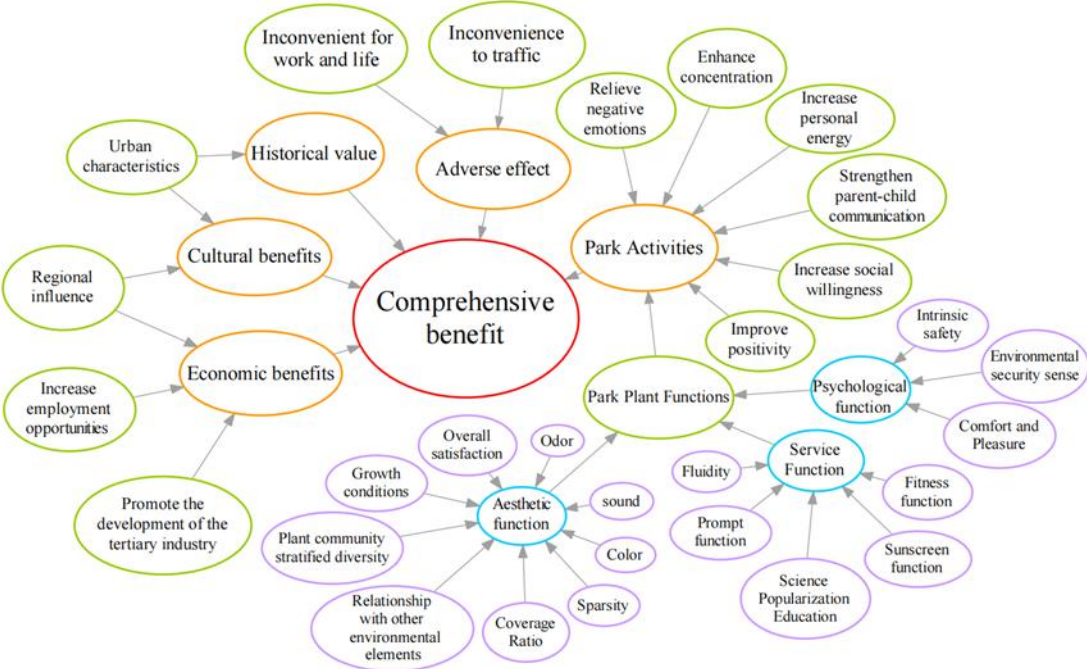

23  
24

Fig. S1 Bayesian network structure of comprehensive benefit

25 **3. Quantification of environmental impacts**

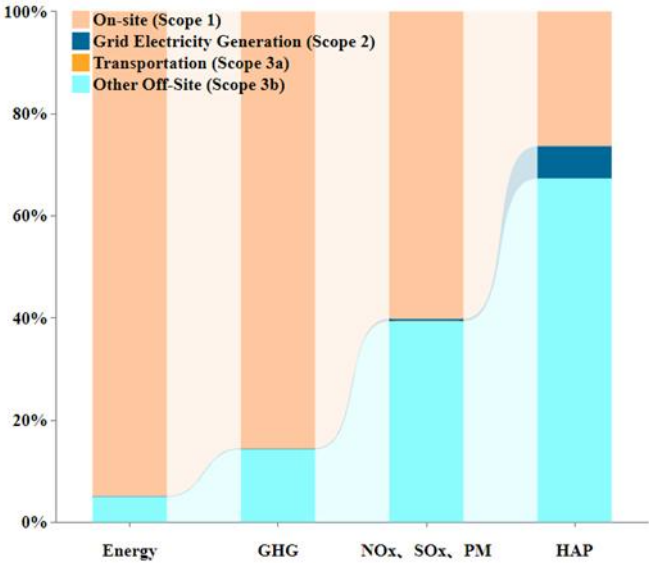

26  
27  
28

Fig. S2 Proportion of environmental impacts at different scopes
